# Supplementary material for: Novel Vaccine against Pathological Pyroglutamate-Modified Amyloid Beta for Prevention of Alzheimer’s Disease
Source: MDPI journal article supplement (doi:10.3390/ijms24129797), 2023-06-06
Supplement: s1 [file s1]

## Supplementary Materials

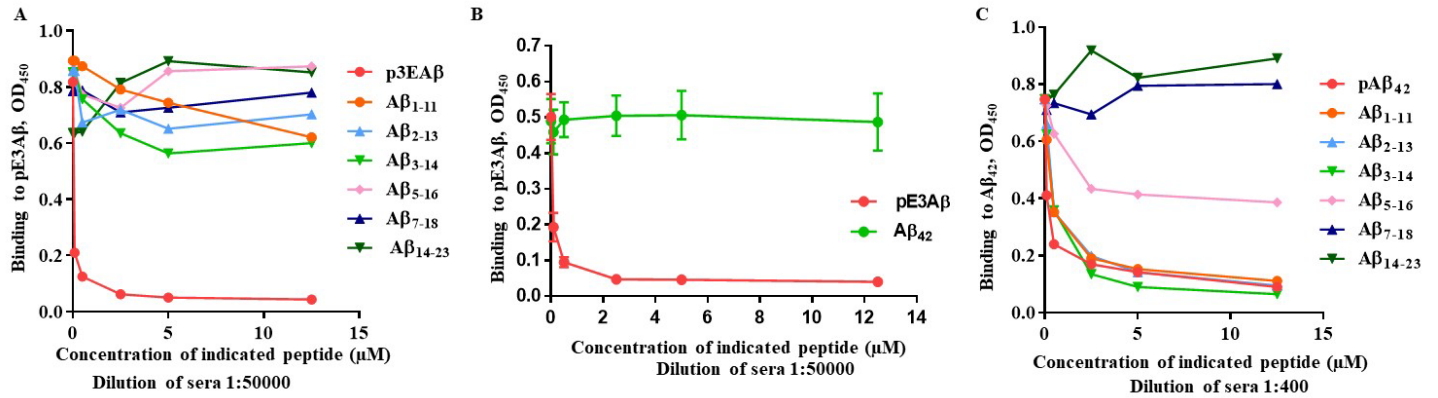

**Figure S1.** Binding inhibition studies with indicated concentrations of various short peptides compassing A $\beta$ <sub>42</sub> using competition assay. The sera from mice immunized with pE3A $\beta$ -based vaccine were diluted and preincubated for 1 hour at 37°C with the aforementioned peptides before binding to pE3A $\beta$ -coated plates (A,B) and A $\beta$ <sub>42</sub>-coated plates (C) to characterize the epitope of non-specific antibodies. Note, that sera were used at a much lower dilution for the third panel.

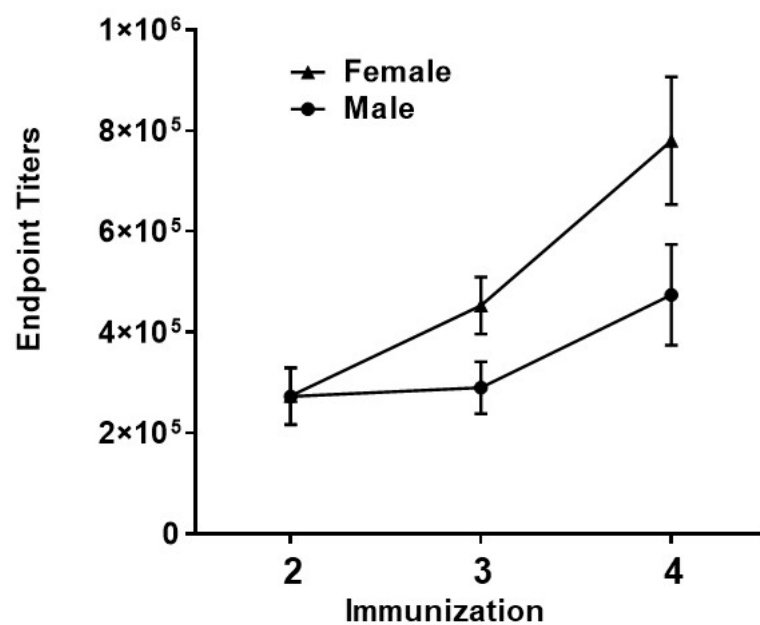

**Figure S2.** Dynamics of humoral immune responses in 5XFAD mice measured by ELISA against the target peptide.

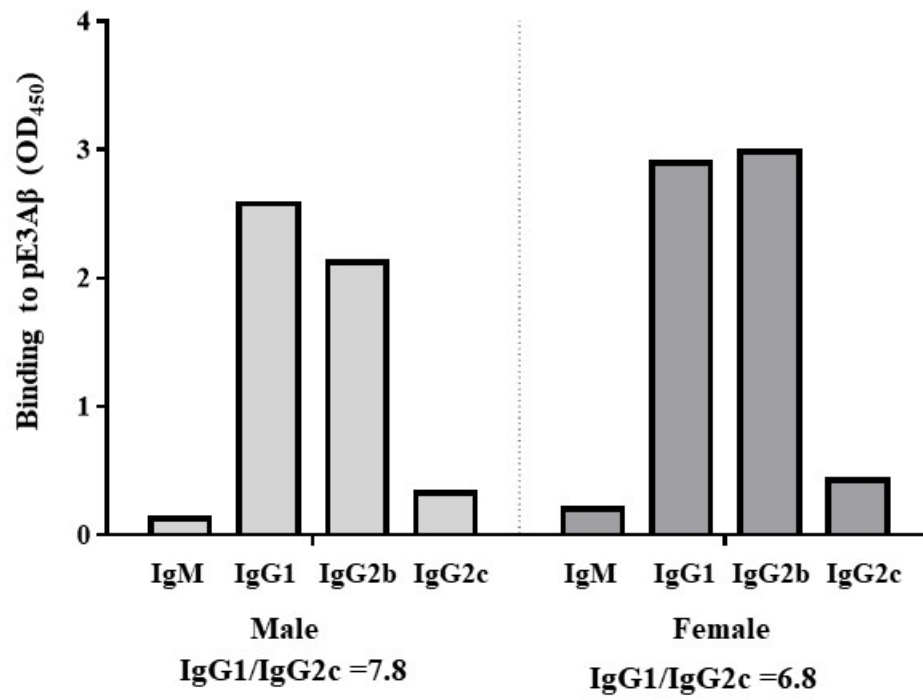

**Figure S3. Immune response isotyping of the pE3Aβ-based vaccine.** Isotypes of antibodies were analyzed in pooled sera collected after the 3<sup>rd</sup> immunization, at dilution 1:1000.

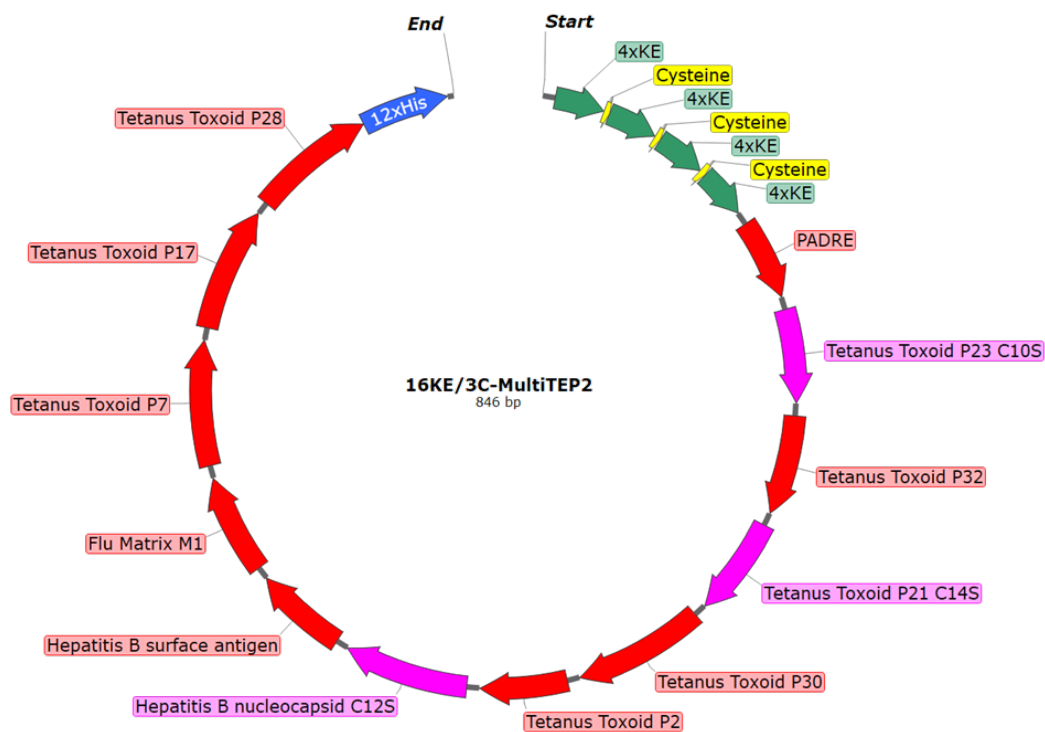

**Figure S4. MultiTEP-based carrier minigene.** The T helper epitopes which have been mutated to remove cysteines are labeled in magenta with the position of each mutation included in the label. The N-terminal conjugation region is composed of four zwitterionic KEKEKEKE repeats flanking three cysteines for reduced steric hindrance and increased solvent access. The C-terminus contains a 12-histidine tag for purification via IMAC.

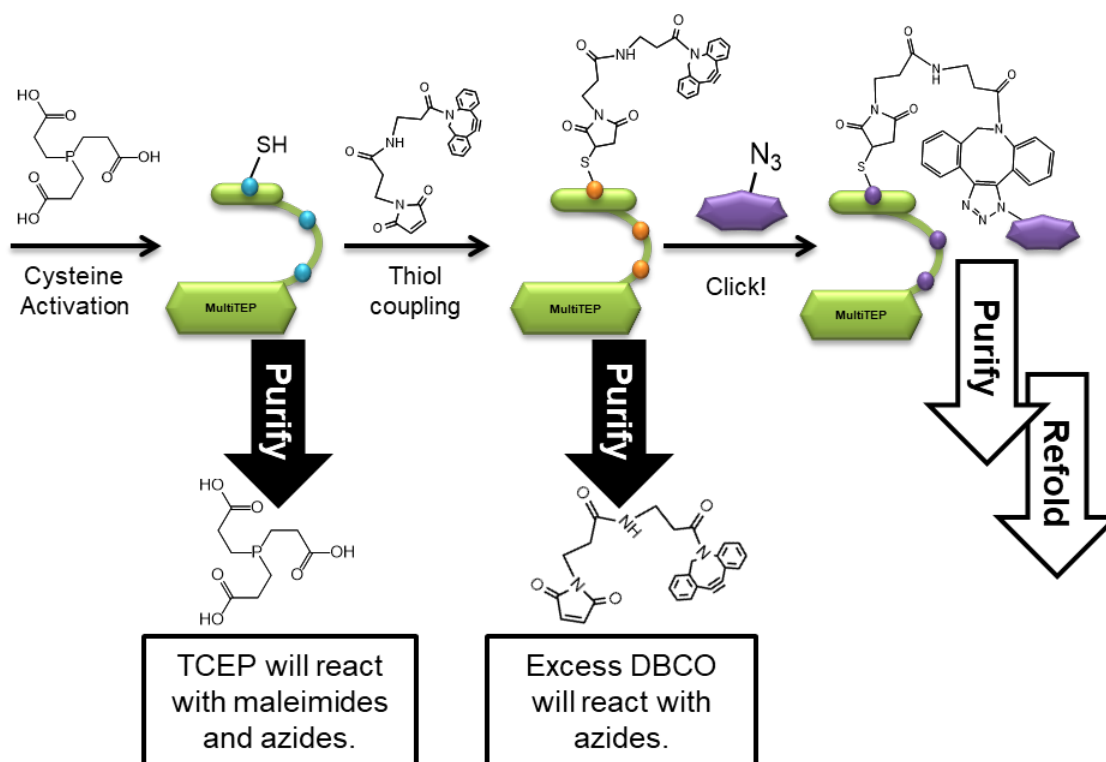

**Figure S5. Preparation of the peptide-carrier conjugate.** The schematic above illustrates the steps involved in the preparation of MultiTEP-based conjugate vaccines. The first step is tris carboxyethyl phosphine (TCEP) -mediated reduction of cysteines in order to obtain active thiols. The excess phosphine was removed by dialysis to avoid interference with downstream processes. The thiols were then labeled with a strained alkyne (DBCO) using thiol-ene Michael addition with a DBCO-Maleimide bifunctional crosslinker. Another dialysis was done to remove the excess cross-linker, and the protein labeled with DBCO moieties was reacted with azide-labeled pE3A $\beta_{3-11}$  via copper-free click chemistry. In order to avoid steric hindrances during the reactions, all the steps were carried out in the presence of 6 M guanidinium hydrochloride. The product was then purified from excess peptide and refolded by gradual dialysis against PBS.
